# Supplementary material for: Electrospun amine-functionalized silica nanoparticles–cellulose acetate nanofiber membranes for effective removal of hardness and heavy metals (As(v), Cd(ii),Pb(ii)) in drinking water sources
Source: Royal Society of Chemistry journal article supplement (doi:10.1039/d3ew00312d), 2023-01-01
Supplement: d3ew00312d1.pdf [file d3ew00312d1.pdf]

## Electrospun amine-functionalized silica nanoparticles - cellulose acetate nanofiber membranes for effective removal of hardness and heavy metals (As(V), Cd(II), Pb(II)) in drinking water sources

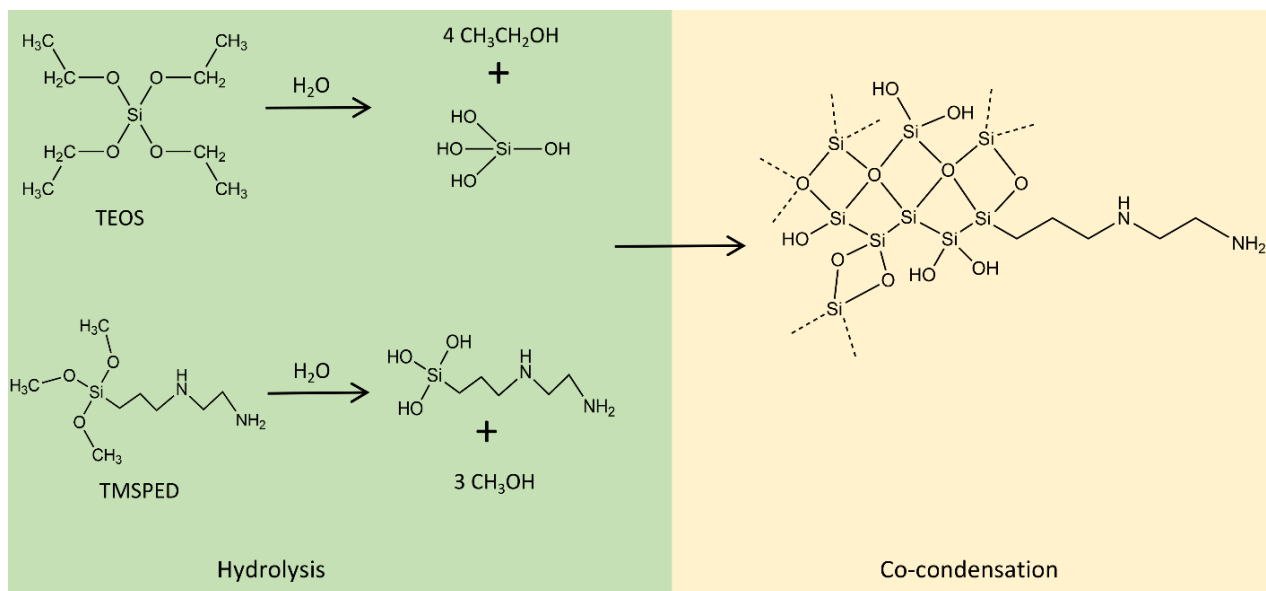

**Reaction scheme S1:** Hydrolysis and co-condensation of TEOS and TMSPED to form the AMS network

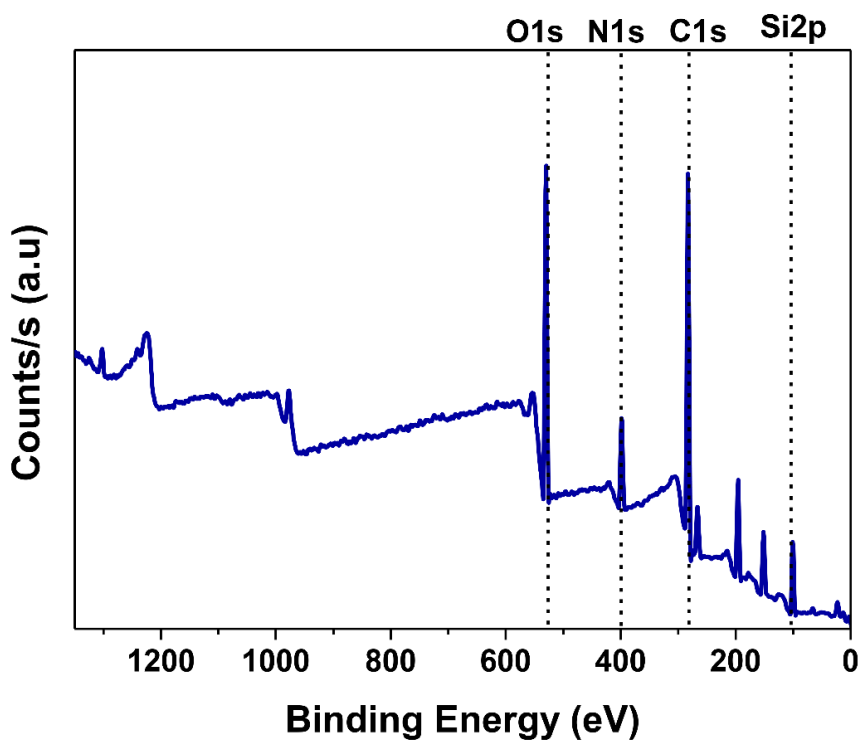

**Figure S1:** XPS Survey spectra of AMS Nps

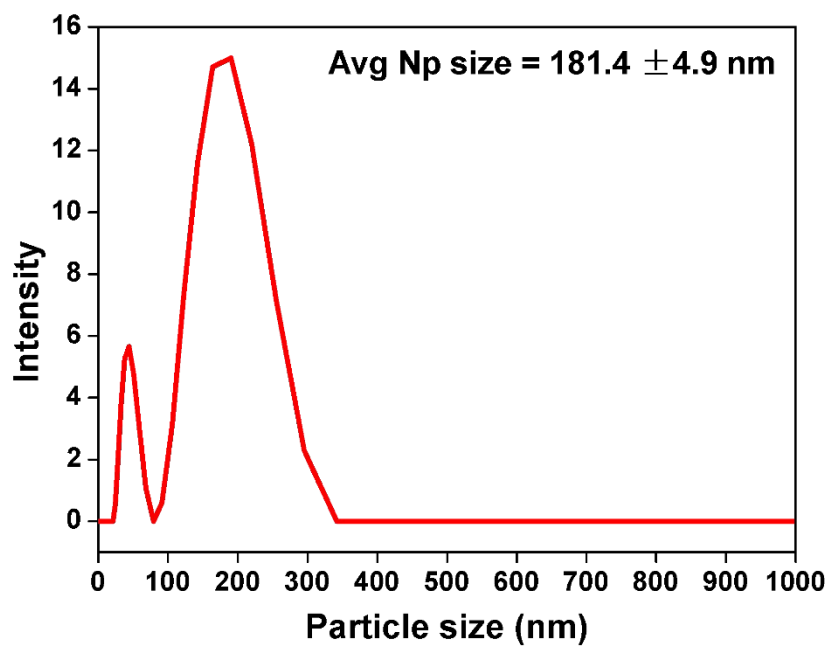

Figure S2: DLS particle size profile of AMS Nps

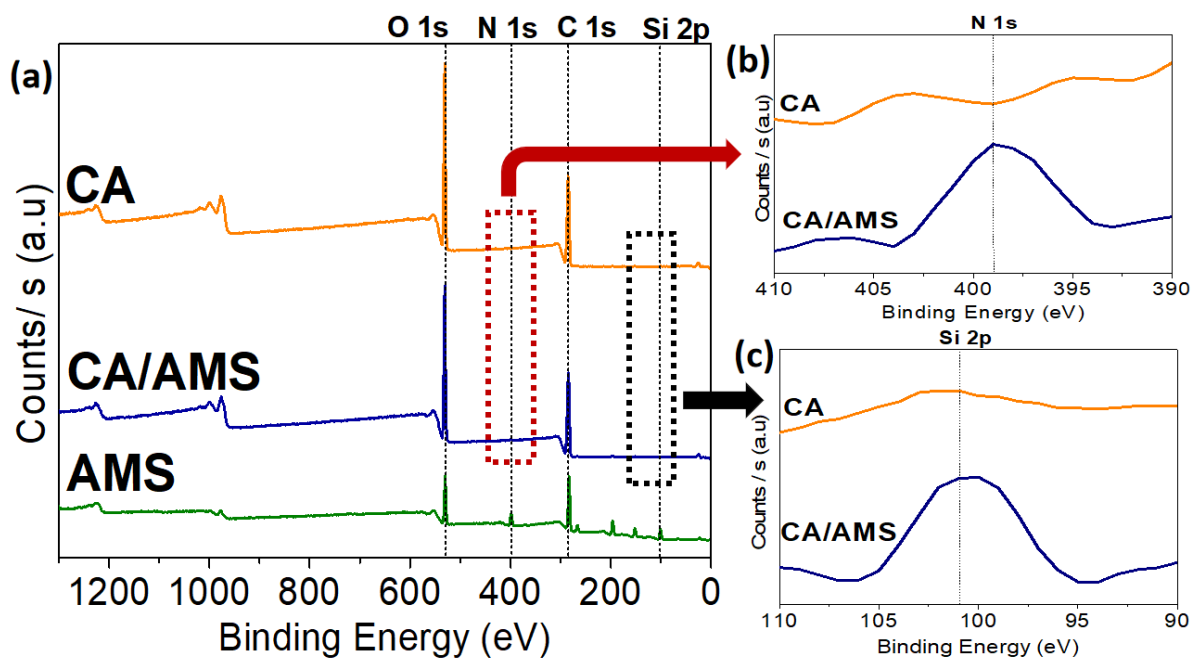

Figure S3: (a) XPS survey spectrum for AMS, CA/AMS, and CA, enlarged peak areas for (b) N1s and (c) Si 2p

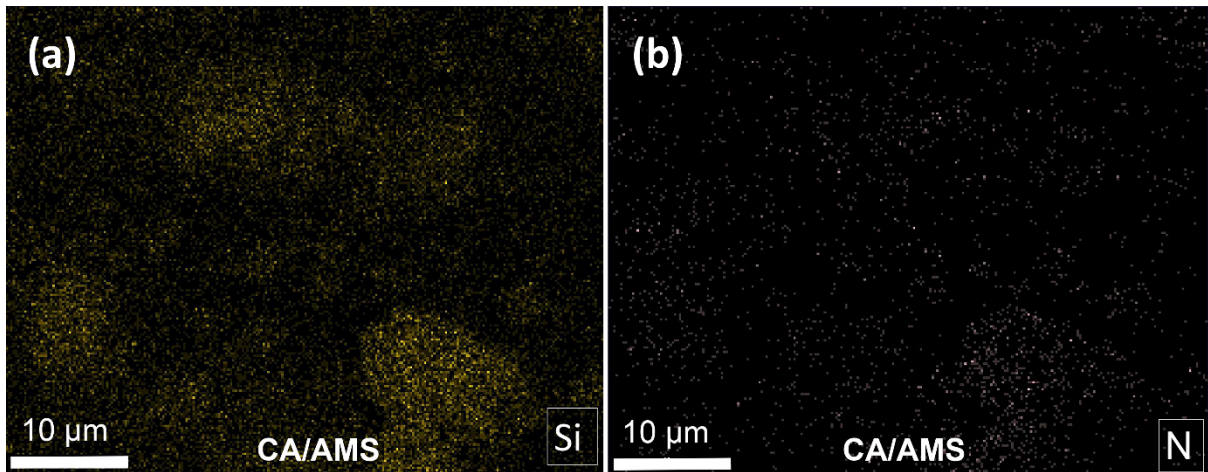

**Figure S4:** EDS mapping of (a) Si and (b) N over CA/AMS membrane.

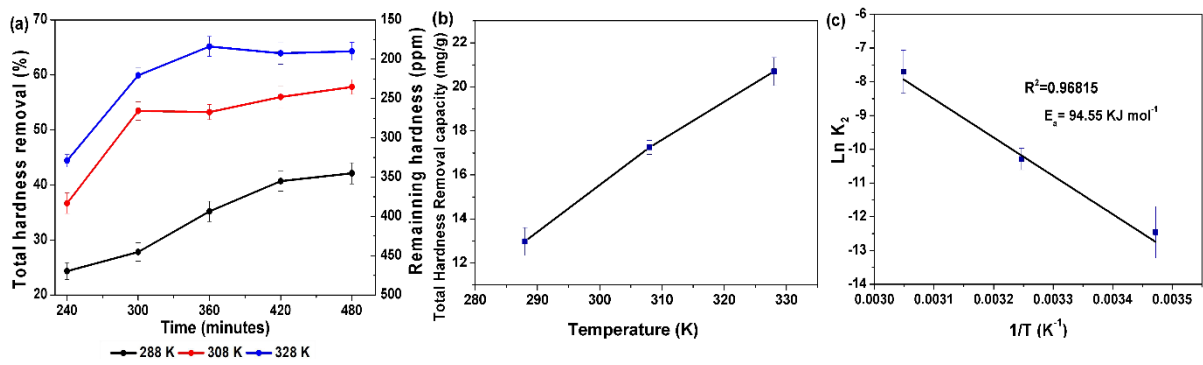

**Figure S5:** (a) Total hardness removal % with time and temperature (b) Total hardness removal capacity at different temperatures and (c) Arrhenius plot for total hardness removal
